# Supplementary material for: Dosage Forms Suitability in Pediatrics: Acceptability of Analgesics and Antipyretics in a German Hospital
Source: MDPI journal article supplement (doi:10.3390/pharmaceutics14020337), 2022-01-31
Supplement: s1 [file s1]

# Supplementary Materials: Dosage Forms Suitability in Pediatrics: Acceptability of Analgesics and Antipyretics in a German Hospital

Viviane Klingmann, Thibault Vallet, Juliane Münch, Robin Stegemann, Lena Wolters, Hans-Martin Bosse, and Fabrice Ruiz

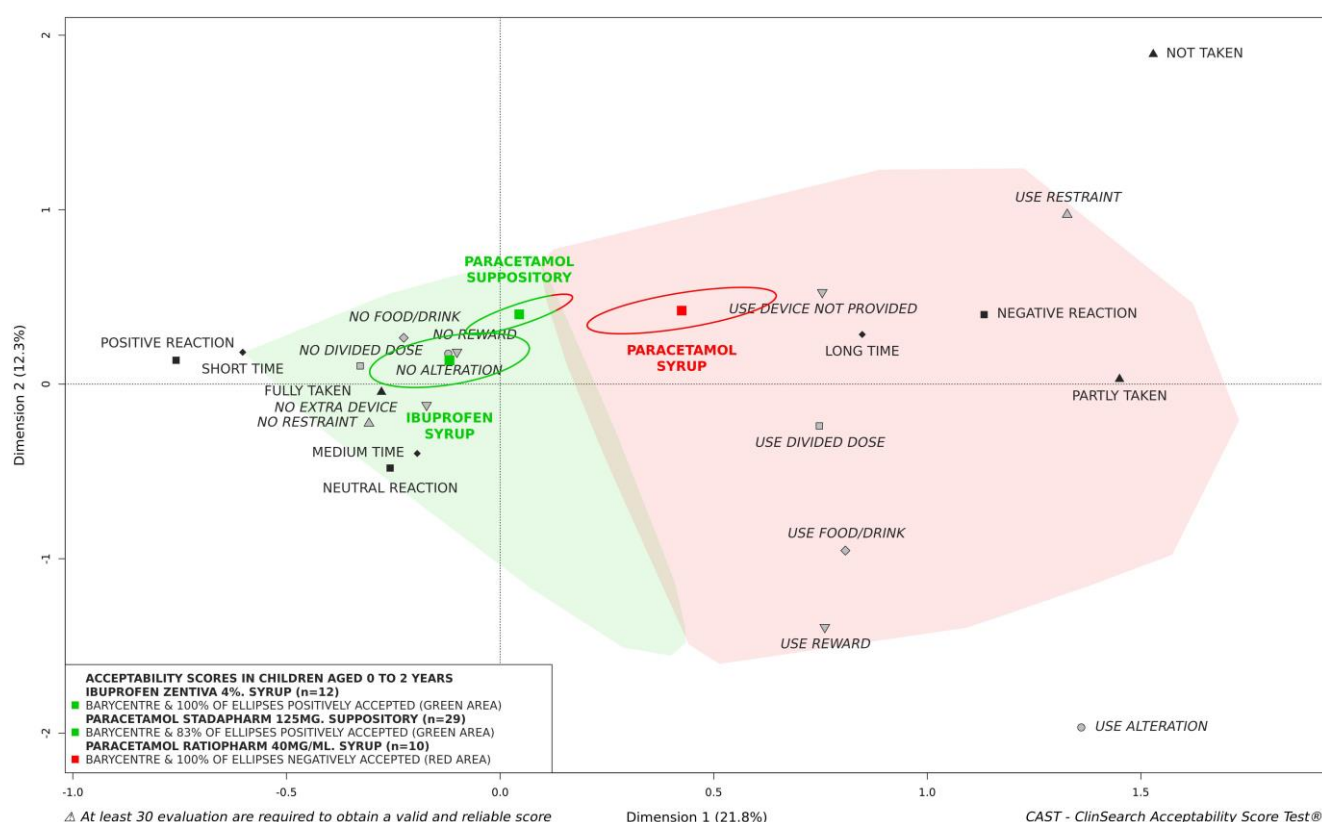

**Figure S1.** Acceptability tendency for three analgesic/antipyretic medicinal products in children aged 0 to 2 years.
